# Supplementary material for: BN-heteroacene-cored luminogens with dual channel detection for fluoride anions
Source: Royal Society of Chemistry journal article supplement (doi:10.1039/c5tc04139b), 2015-12-30
Supplement: c5tc04139b1.pdf [file c5tc04139b1.pdf]

*Supporting Information*

**BN-heteroacene-cored Luminogens with Dual Channel  
Detection for Fluoride Anion**

Jing Zhou,<sup>a,†</sup> Ruizhi Tang,<sup>a,†</sup> Xinyang Wang,<sup>a</sup> Wanzheng Zhang,<sup>a</sup> Xiaodong Zhuang,<sup>a</sup> Fan Zhang<sup>\*,a</sup>

$^1\text{H}$ ,  $^{13}\text{C}$ NMR and HRMS spectra for new compounds

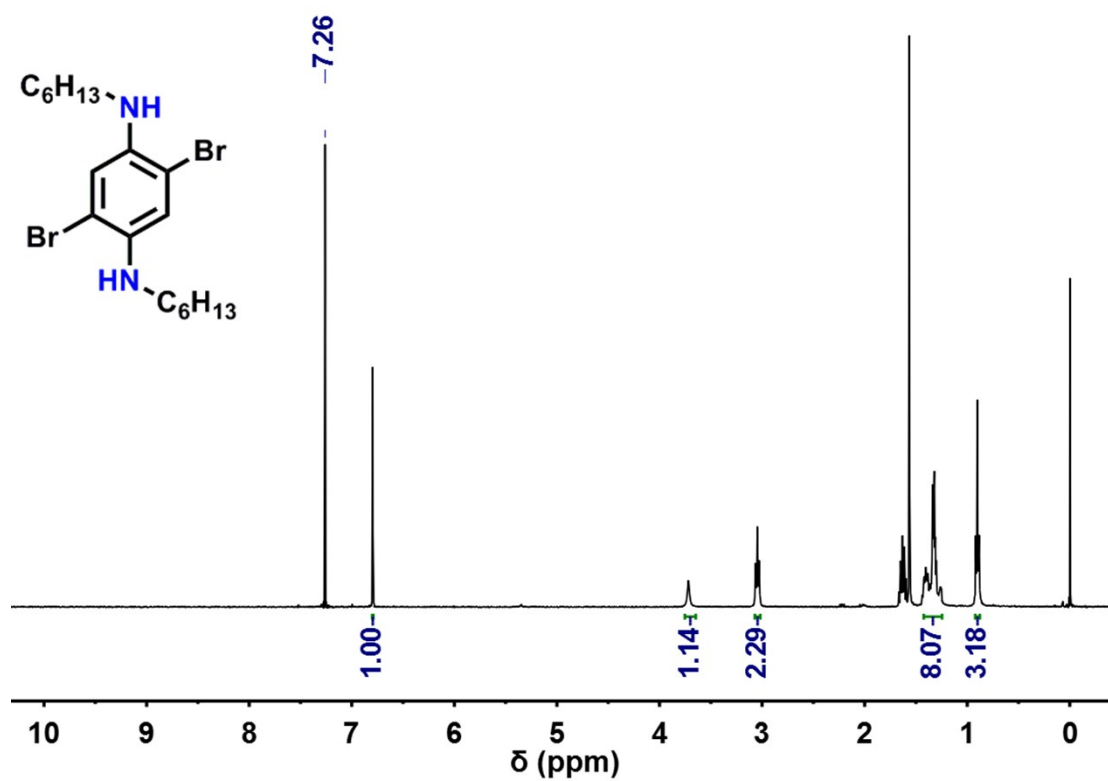

Figure S1.  $^1\text{H}$  NMR spectra of compound 2

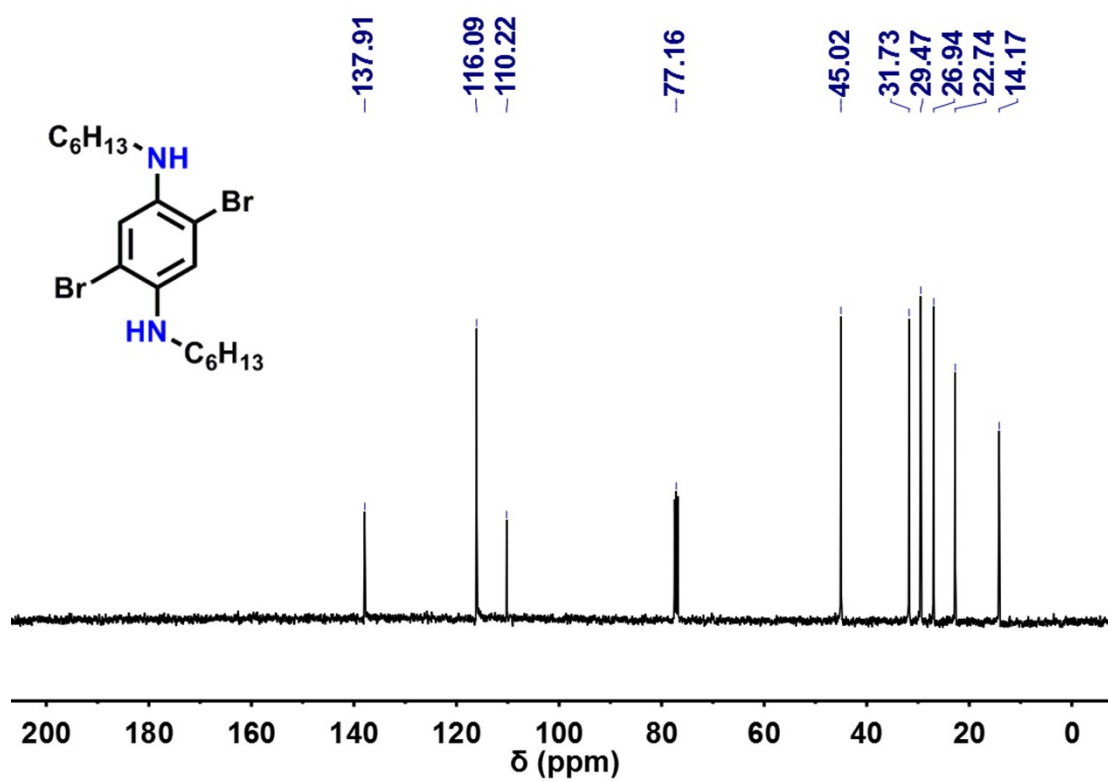

Figure S2.  $^{13}\text{C}$  NMR spectra of compound 2

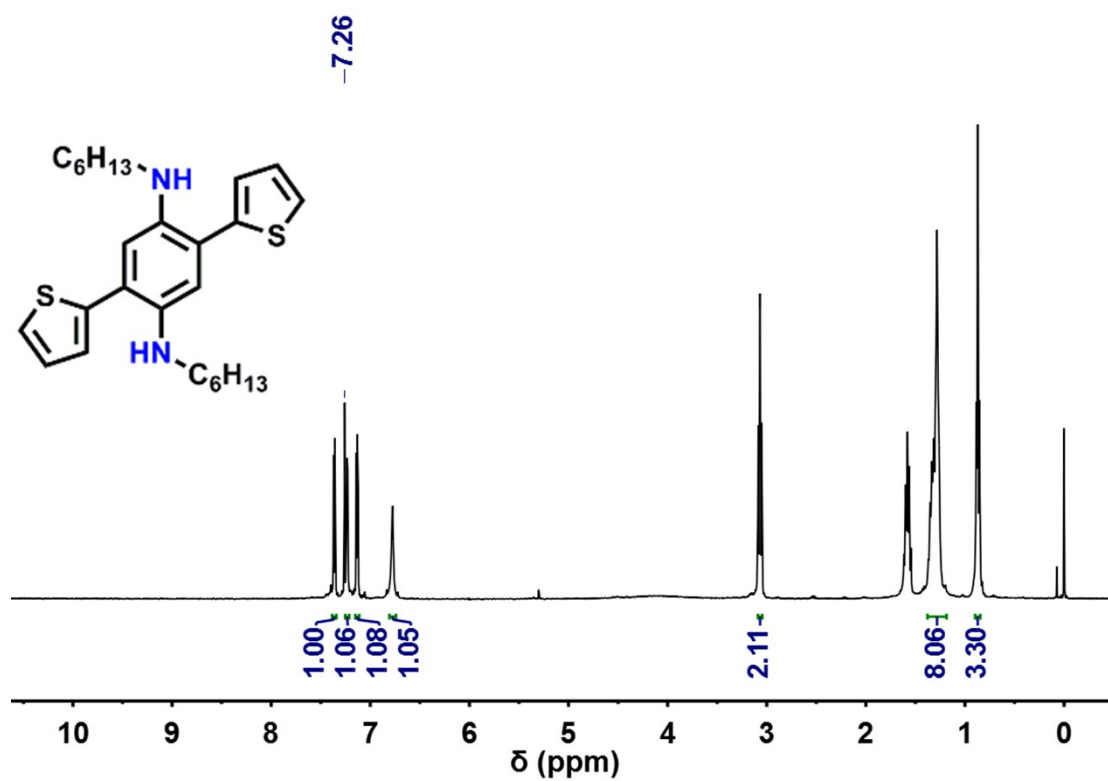

Figure S3.  $^1\text{H}$  NMR spectra of compound 3

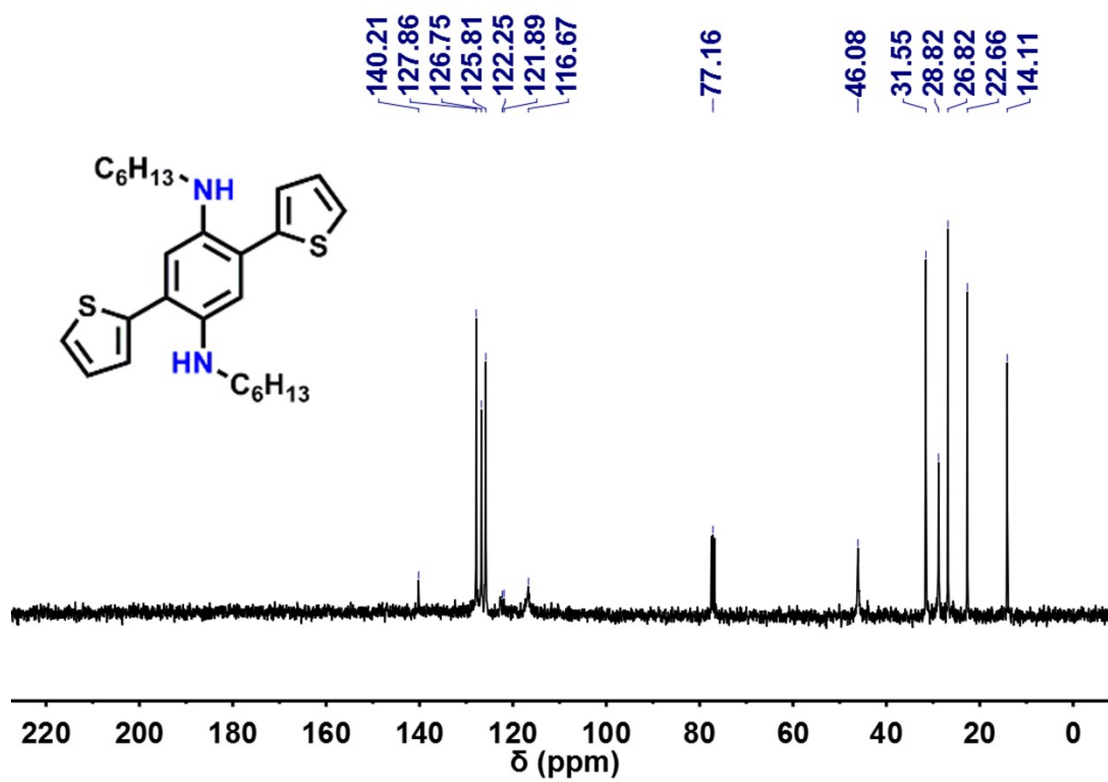

Figure S4.  $^{13}\text{C}$  NMR spectra of compound 3

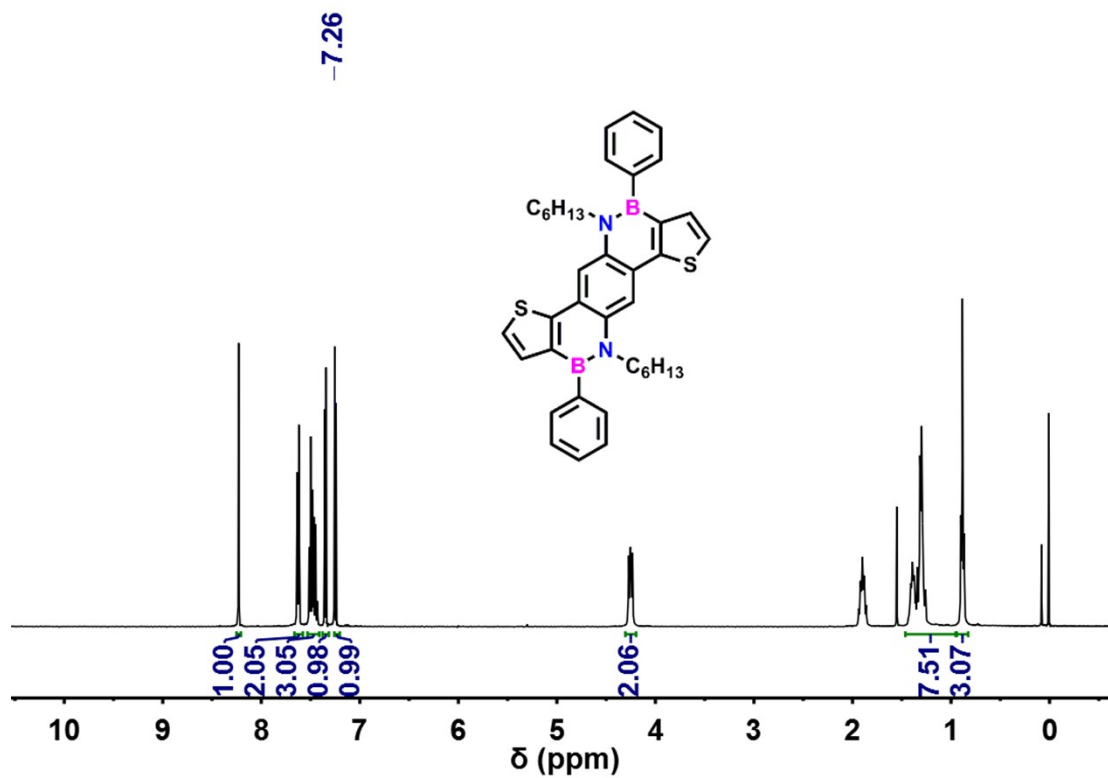

Figure S3.  $^1\text{H}$  NMR spectra of compound 4

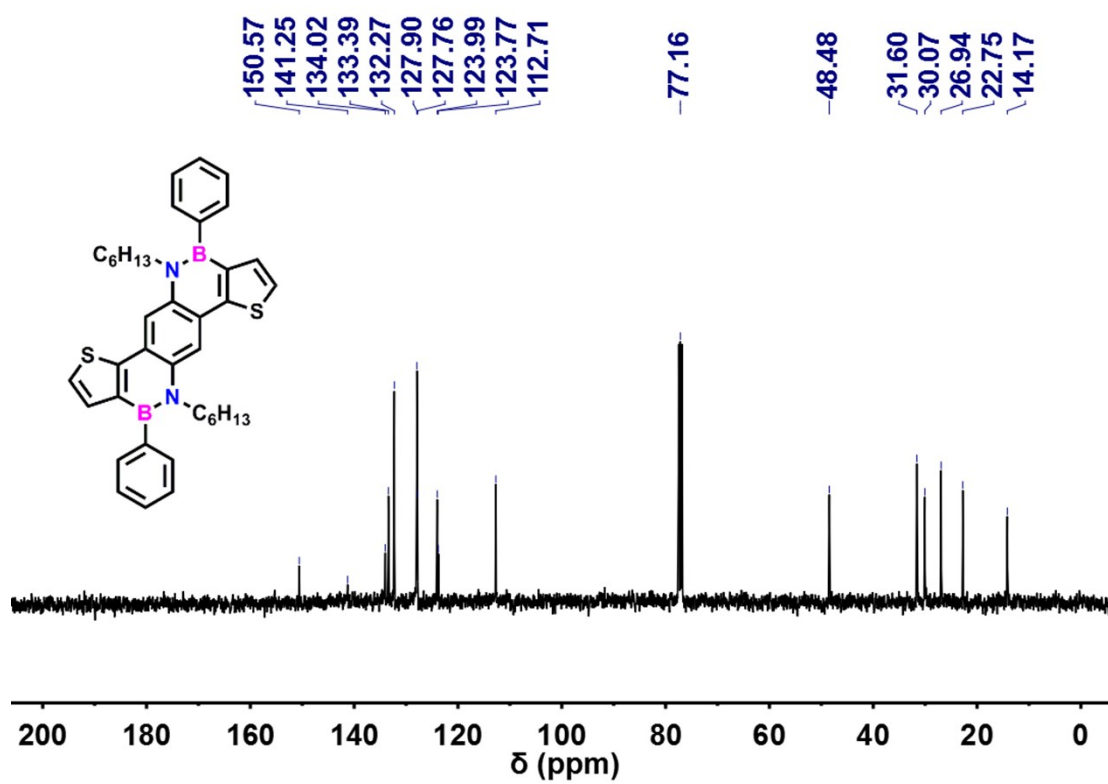

Figure S4.  $^{13}\text{C}$  NMR spectra of compound 4

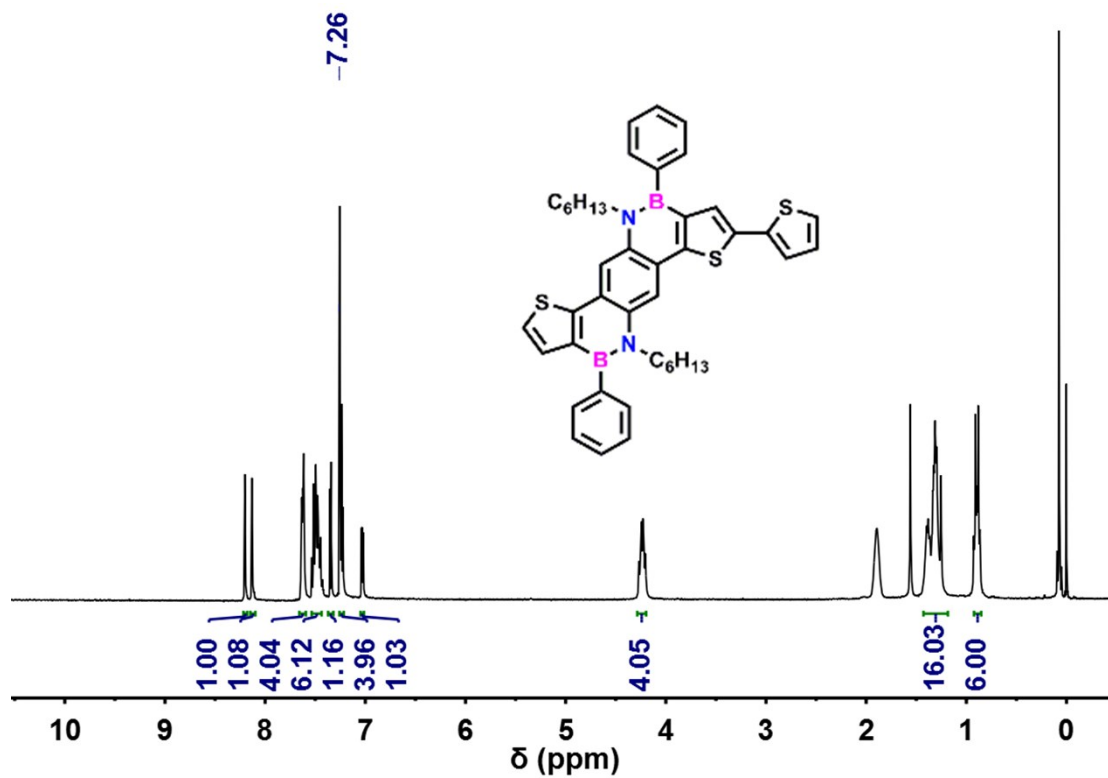

Figure S5. <sup>1</sup>H NMR spectra of compound 6a

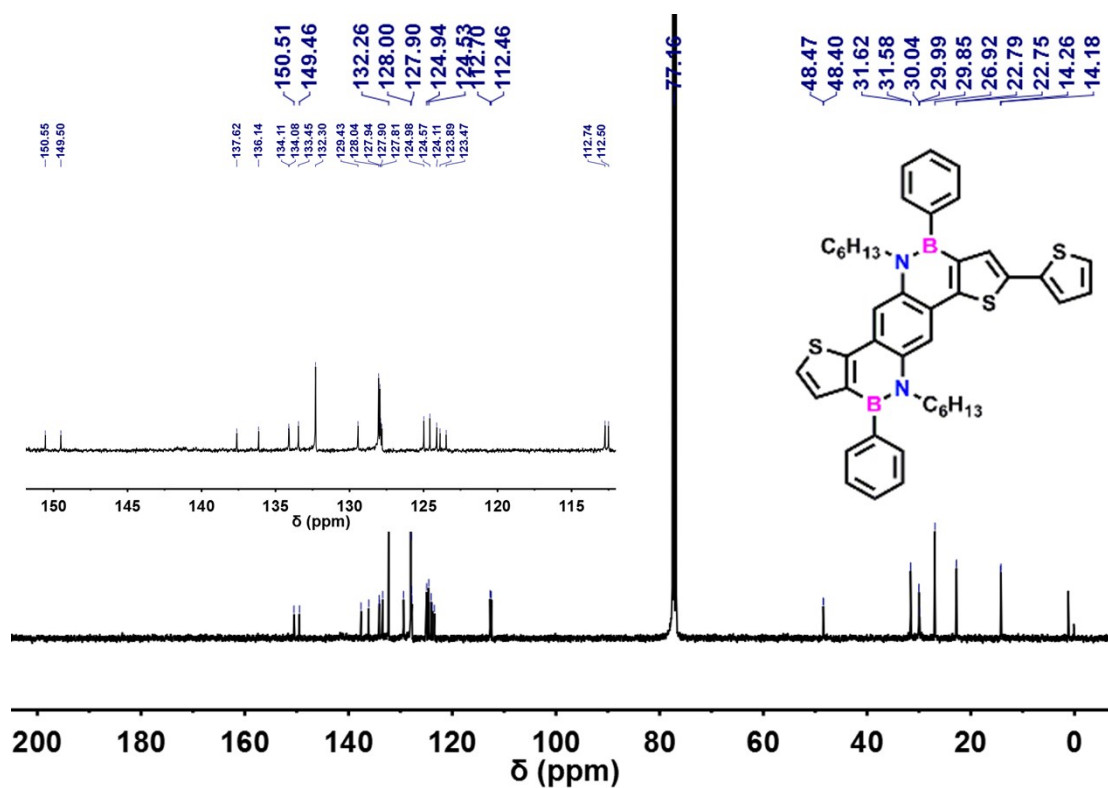

Figure S6. <sup>13</sup>C NMR spectra of compound 6a

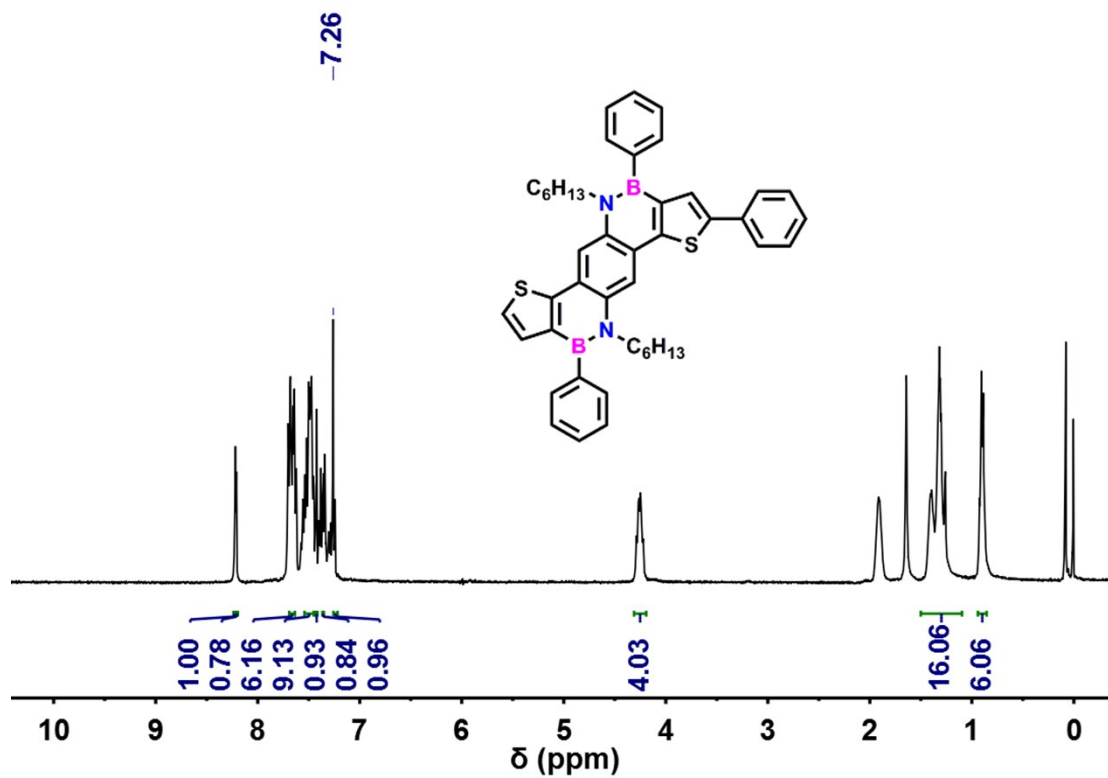

Figure S7.  $^1\text{H}$  NMR spectra of compound **6b**

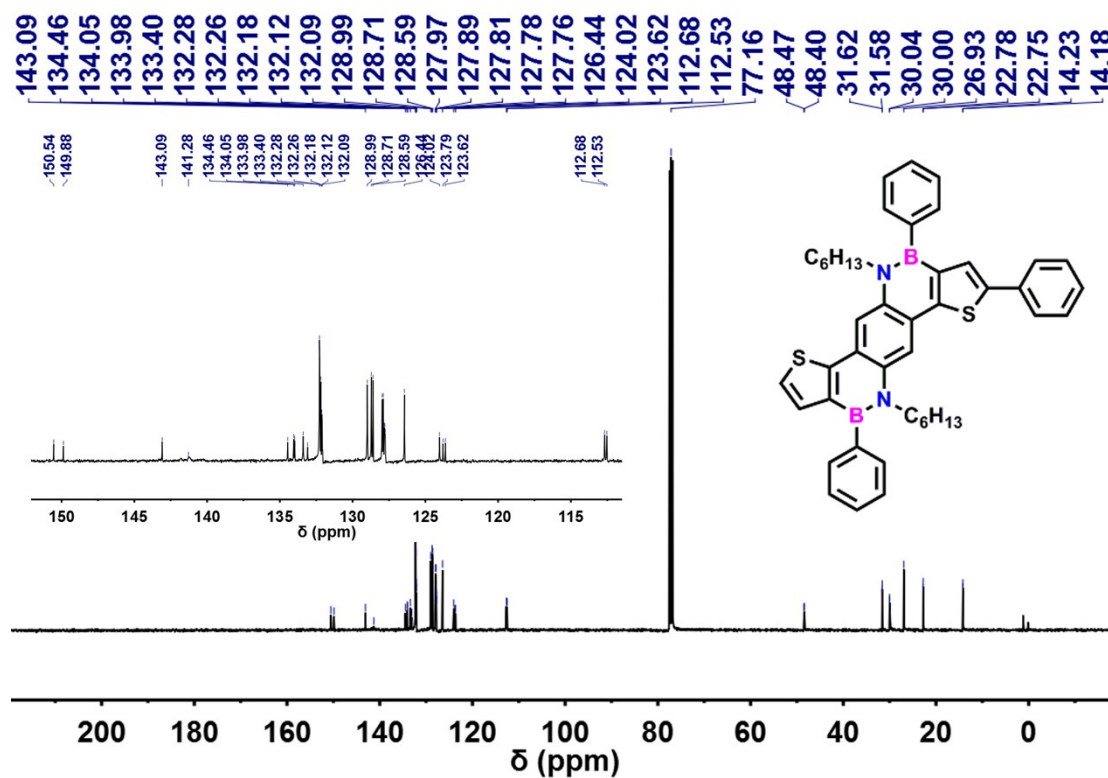

Figure S8.  $^{13}\text{C}$  NMR spectra of compound **6b**

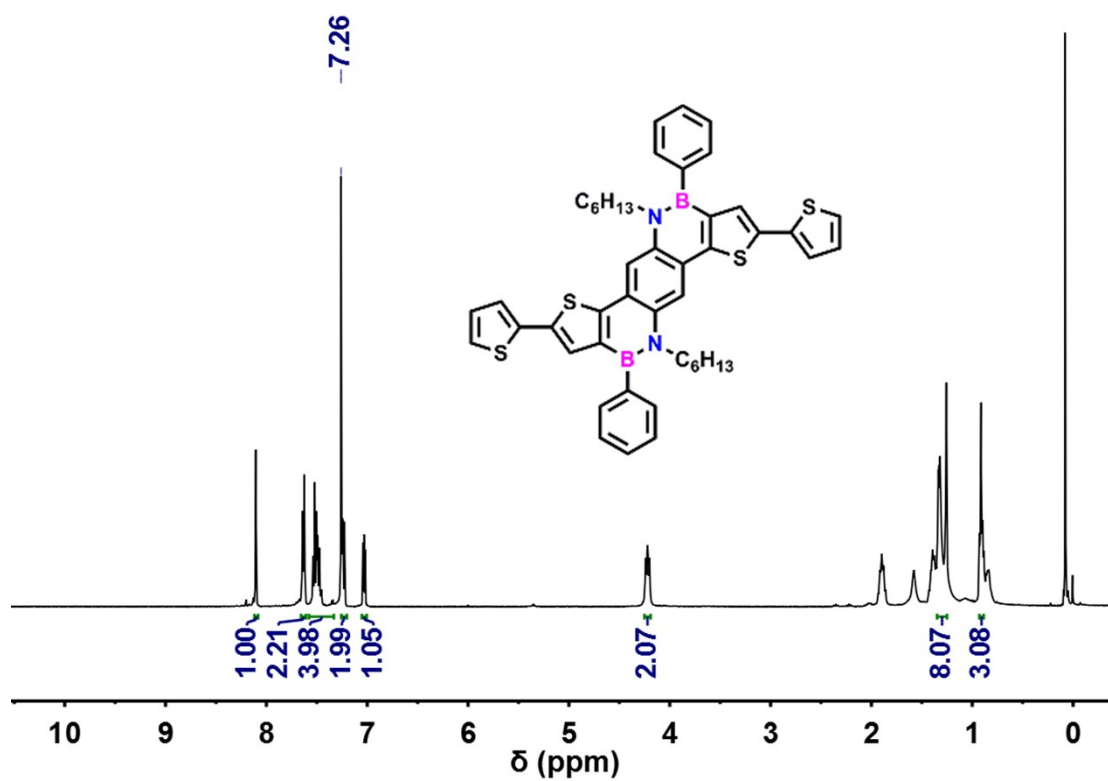

Figure S9. <sup>1</sup>H NMR spectra of compound 6c

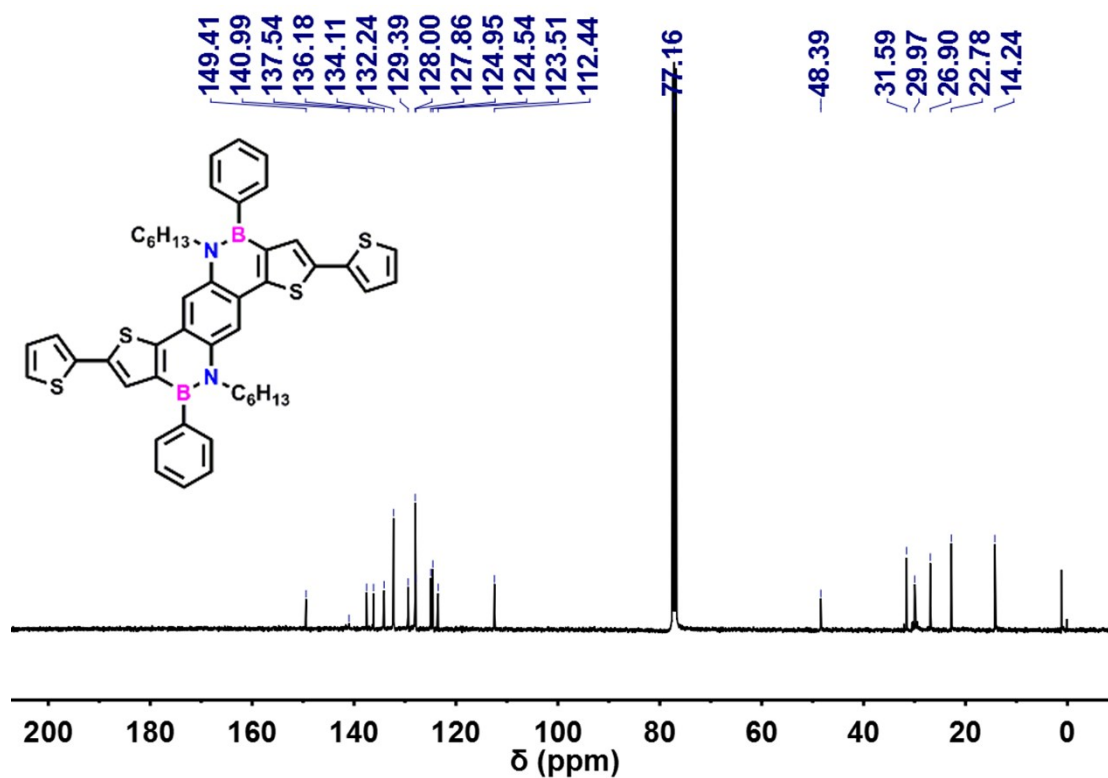

Figure S10. <sup>13</sup>C NMR spectra of compound 6c

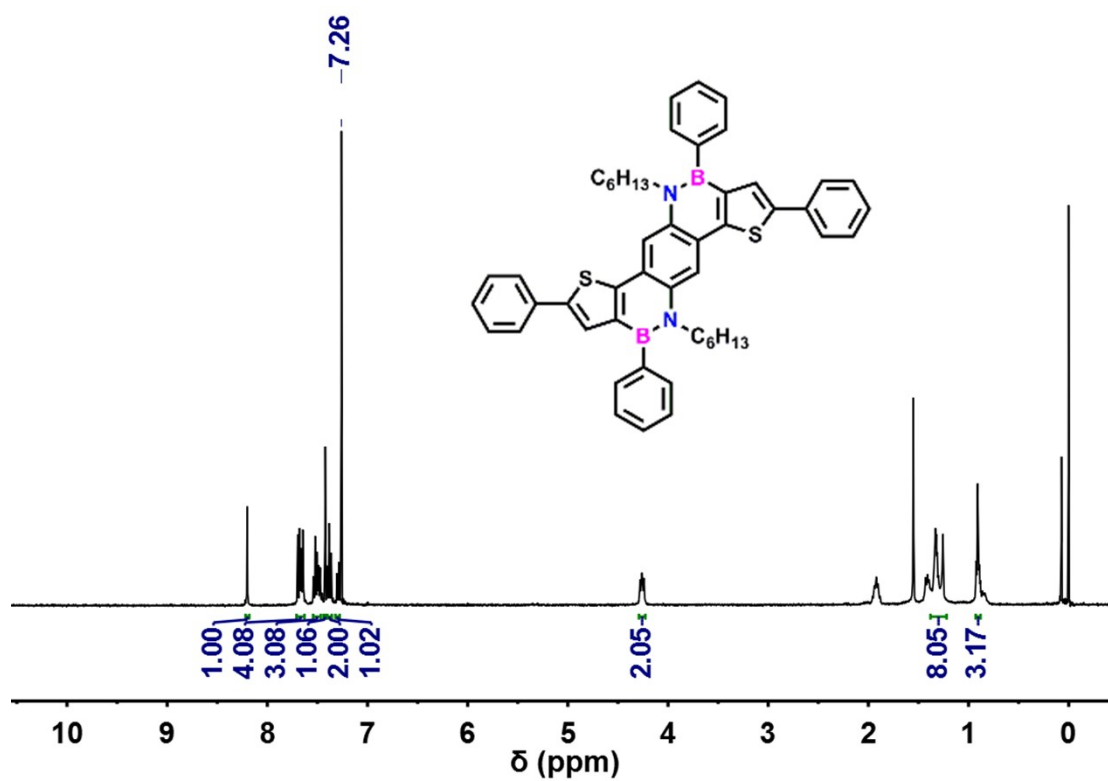

Figure S11. <sup>1</sup>H NMR spectra of compound 6d

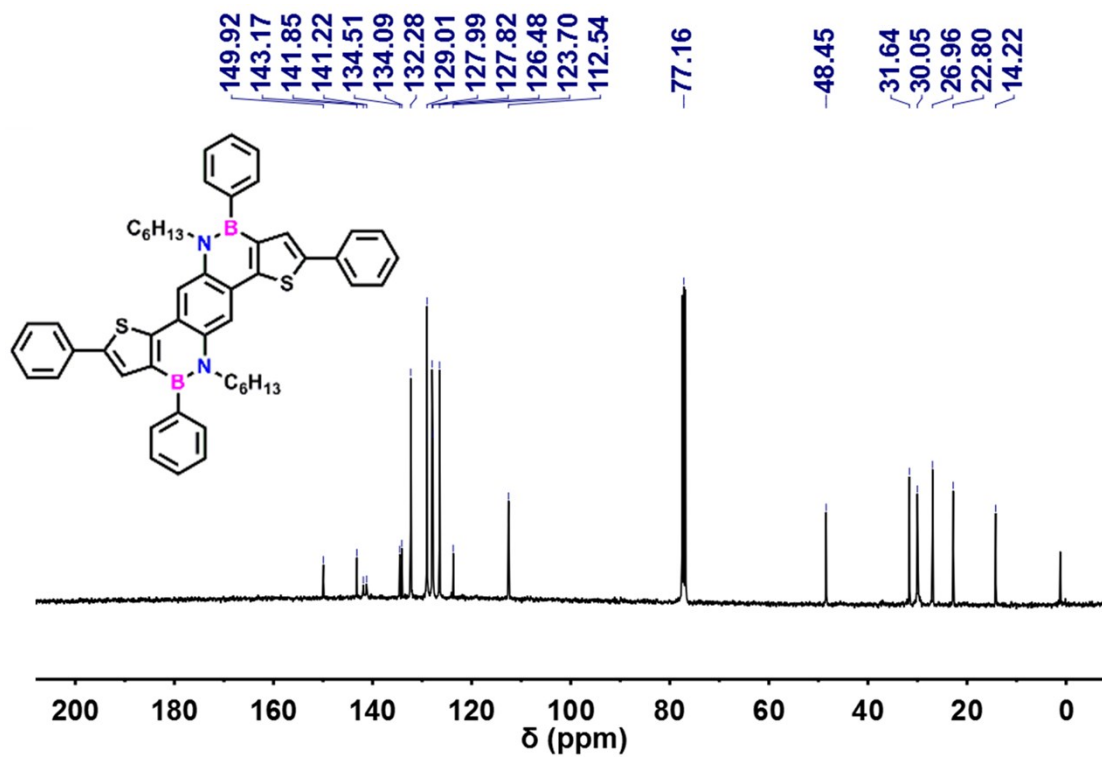

Figure S12. <sup>13</sup>C NMR spectra of compound 6d



## Mass Spectrum SmartFormula Report

### Analysis Info

Analysis Name D:\Data\gaojh\Q-TOF-gaojh-20141216-ZJ2014-12-8-8.d  
Method tune\_100-600\_pos141217.m  
Sample Name ZJ2014-12-8-8  
Comment

Acquisition Date 12/17/2014 10:18:35 AM

Operator Jiang  
Instrument / Ser# micrOTOF-Q II 10324

### Acquisition Parameter

|             |         |                       |           |                  |           |
|-------------|---------|-----------------------|-----------|------------------|-----------|
| Source Type | ESI     | Ion Polarity          | Positive  | Set Nebulizer    | 0.4 Bar   |
| Focus       | Active  | Set Capillary         | 4500 V    | Set Dry Heater   | 200 °C    |
| Scan Begin  | 50 m/z  | Set End Plate Offset  | -500 V    | Set Dry Gas      | 2.2 l/min |
| Scan End    | 600 m/z | Set Collision Cell RF | 120.0 Vpp | Set Divert Valve | Source    |

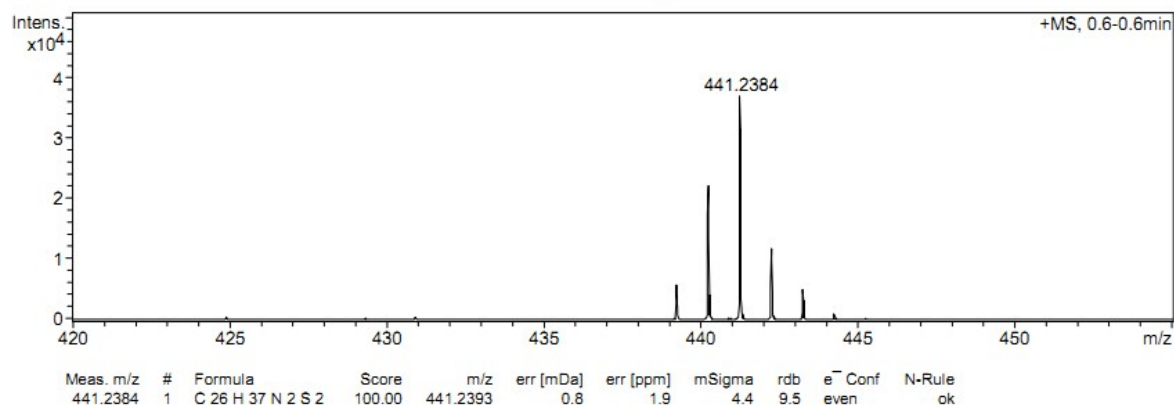

Figure S13. HRMS of 3

## Mass Spectrum SmartFormula Report

### Analysis Info

Analysis Name D:\Data\gaojh\Q-TOF-gaojh-20141216-ZJ2014-12-8-1.d  
Method tune-posAPCI-300-1200\_141111.m  
Sample Name ZJ2014-12-8-1  
Comment

Acquisition Date 12/17/2014 3:11:25 PM

Operator Jiang  
Instrument / Ser# micrOTOF-Q II 10324

### Acquisition Parameter

|             |          |                       |           |                  |           |
|-------------|----------|-----------------------|-----------|------------------|-----------|
| Source Type | APCI     | Ion Polarity          | Positive  | Set Nebulizer    | 1.0 Bar   |
| Focus       | Active   | Set Capillary         | 4500 V    | Set Dry Heater   | 200 °C    |
| Scan Begin  | 200 m/z  | Set End Plate Offset  | -500 V    | Set Dry Gas      | 1.5 l/min |
| Scan End    | 1200 m/z | Set Collision Cell RF | 120.0 Vpp | Set Divert Valve | Source    |

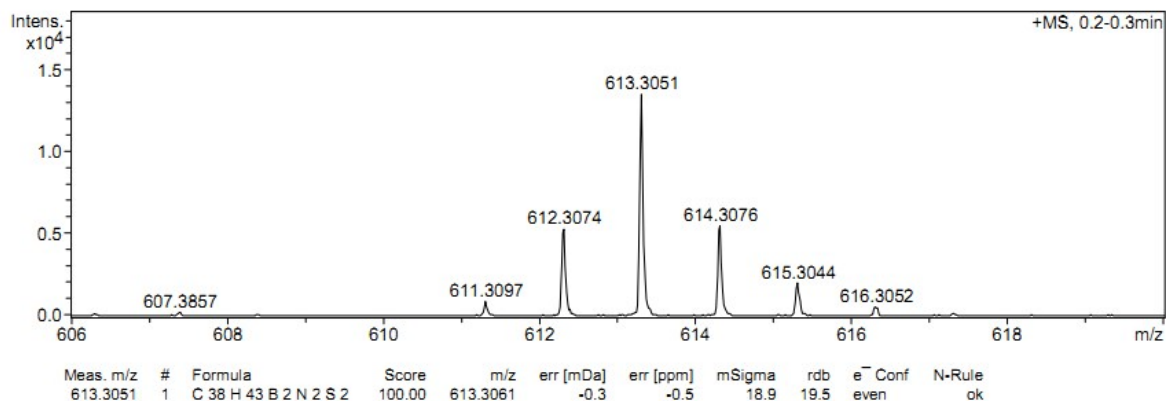

Figure S14. HRMS of 4

## Mass Spectrum SmartFormula Report

### Analysis Info

Analysis Name D:\Data\gaojh\QTOF-Gaojh150618-ZJ20150509-1\_01.d  
Method tune-posAPCI-300-1200\_141111.m  
Sample Name -ZJ20150509-1  
Comment

Acquisition Date 6/18/2015 3:07:16 PM

Operator Jiang  
Instrument / Ser# micrOTOF-Q II 10324

### Acquisition Parameter

|             |          |                       |           |                  |           |
|-------------|----------|-----------------------|-----------|------------------|-----------|
| Source Type | APCI     | Ion Polarity          | Positive  | Set Nebulizer    | 2.0 Bar   |
| Focus       | Active   | Set Capillary         | 4500 V    | Set Dry Heater   | 200 °C    |
| Scan Begin  | 200 m/z  | Set End Plate Offset  | -500 V    | Set Dry Gas      | 1.2 l/min |
| Scan End    | 1200 m/z | Set Collision Cell RF | 120.0 Vpp | Set Divert Valve | Source    |

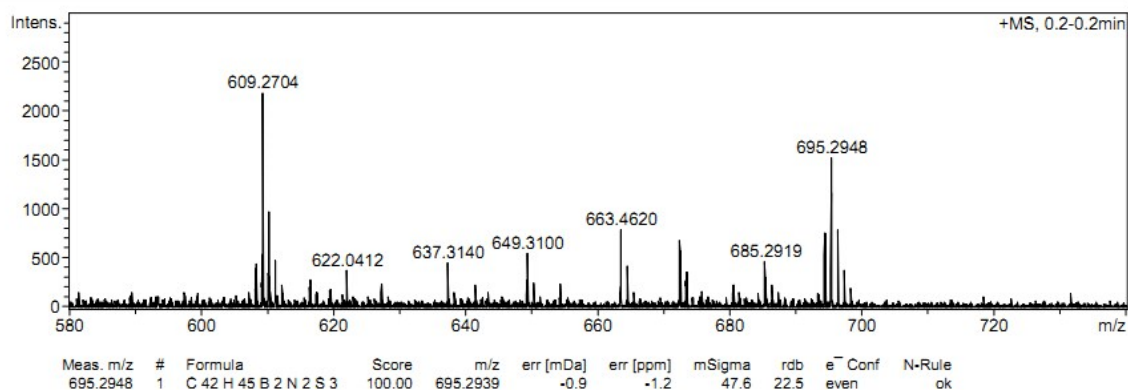

Figure S15. HRMS of 6a

## Mass Spectrum SmartFormula Report

### Analysis Info

Analysis Name D:\Data\gaojh\QTOF-Gaojh150618-ZJ20150509-3\_01.d  
Method tune-posAPCI-300-1200\_141111.m  
Sample Name -ZJ20150509-3  
Comment

Acquisition Date 6/18/2015 3:11:13 PM

Operator Jiang  
Instrument / Ser# micrOTOF-Q II 10324

### Acquisition Parameter

|             |          |                       |           |                  |           |
|-------------|----------|-----------------------|-----------|------------------|-----------|
| Source Type | APCI     | Ion Polarity          | Positive  | Set Nebulizer    | 2.0 Bar   |
| Focus       | Active   | Set Capillary         | 4500 V    | Set Dry Heater   | 200 °C    |
| Scan Begin  | 200 m/z  | Set End Plate Offset  | -500 V    | Set Dry Gas      | 1.2 l/min |
| Scan End    | 1200 m/z | Set Collision Cell RF | 120.0 Vpp | Set Divert Valve | Source    |

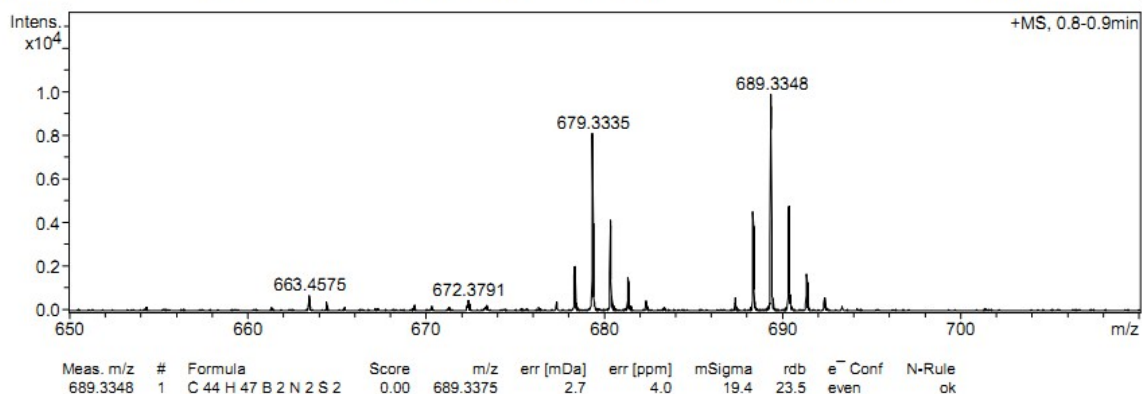

Figure S16. HRMS of 6b

## Mass Spectrum SmartFormula Report

### Analysis Info

Analysis Name D:\Data\gaojh\QTOF-Gaojh150618-ZJ20150509-2\_01.d  
Method tune-posAPCI-300-1200\_141111.m  
Sample Name -ZJ20150509-2  
Comment

Acquisition Date 6/18/2015 3:09:09 PM

Operator Jiang  
Instrument / Ser# micrOTOF-Q II 10324

### Acquisition Parameter

|             |          |                       |           |                  |           |
|-------------|----------|-----------------------|-----------|------------------|-----------|
| Source Type | APCI     | Ion Polarity          | Positive  | Set Nebulizer    | 2.0 Bar   |
| Focus       | Active   | Set Capillary         | 4500 V    | Set Dry Heater   | 200 °C    |
| Scan Begin  | 200 m/z  | Set End Plate Offset  | -500 V    | Set Dry Gas      | 1.2 l/min |
| Scan End    | 1200 m/z | Set Collision Cell RF | 120.0 Vpp | Set Divert Valve | Source    |

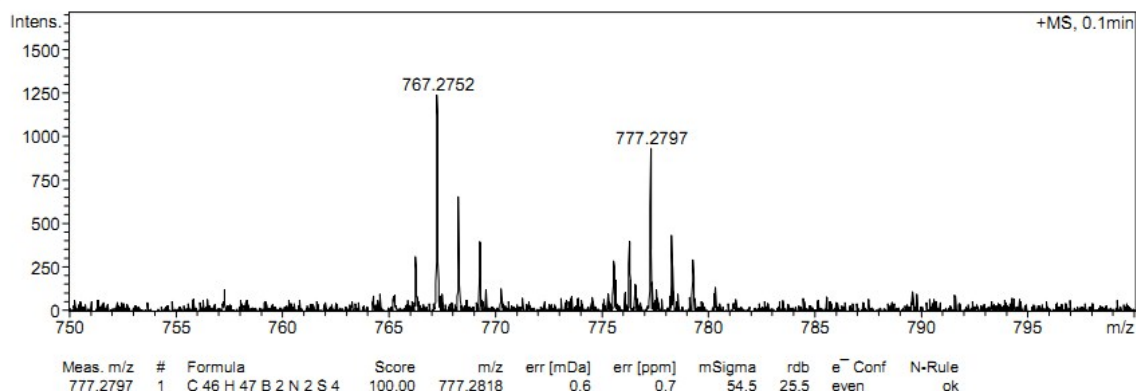

Figure S17. NMRS of 6c

## Mass Spectrum SmartFormula Report

### Analysis Info

Analysis Name D:\Data\gaojh\QTOF-Gaojh150618-ZJ20150509-4\_01.d  
Method tune-posAPCI-300-1200\_141111.m  
Sample Name ZJ20150509-4  
Comment

Acquisition Date 6/18/2015 3:14:15 PM

Operator Jiang  
Instrument / Ser# micrOTOF-Q II 10324

### Acquisition Parameter

|             |          |                       |           |                  |           |
|-------------|----------|-----------------------|-----------|------------------|-----------|
| Source Type | APCI     | Ion Polarity          | Positive  | Set Nebulizer    | 2.0 Bar   |
| Focus       | Active   | Set Capillary         | 4500 V    | Set Dry Heater   | 200 °C    |
| Scan Begin  | 200 m/z  | Set End Plate Offset  | -500 V    | Set Dry Gas      | 1.2 l/min |
| Scan End    | 1200 m/z | Set Collision Cell RF | 120.0 Vpp | Set Divert Valve | Source    |

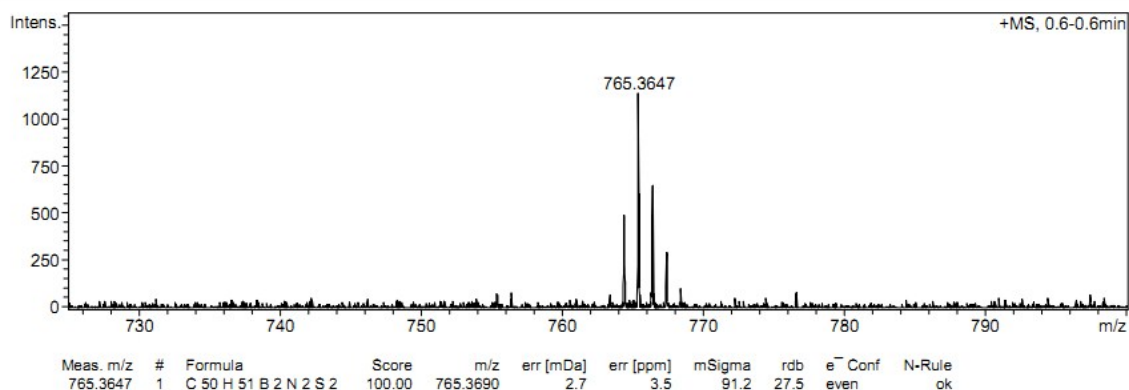

Figure S18. HRMS of 6d

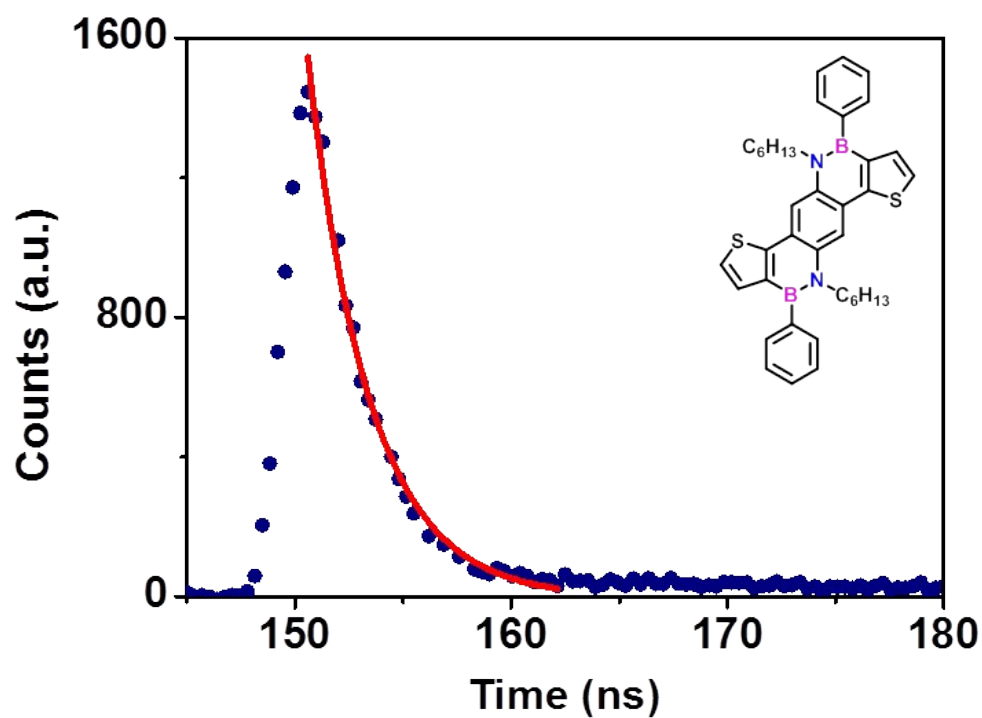

Figure S19. Fluorescence decay curve for **4** in  $\text{CHCl}_3$  solution ( $1 \times 10^{-5}$  M).

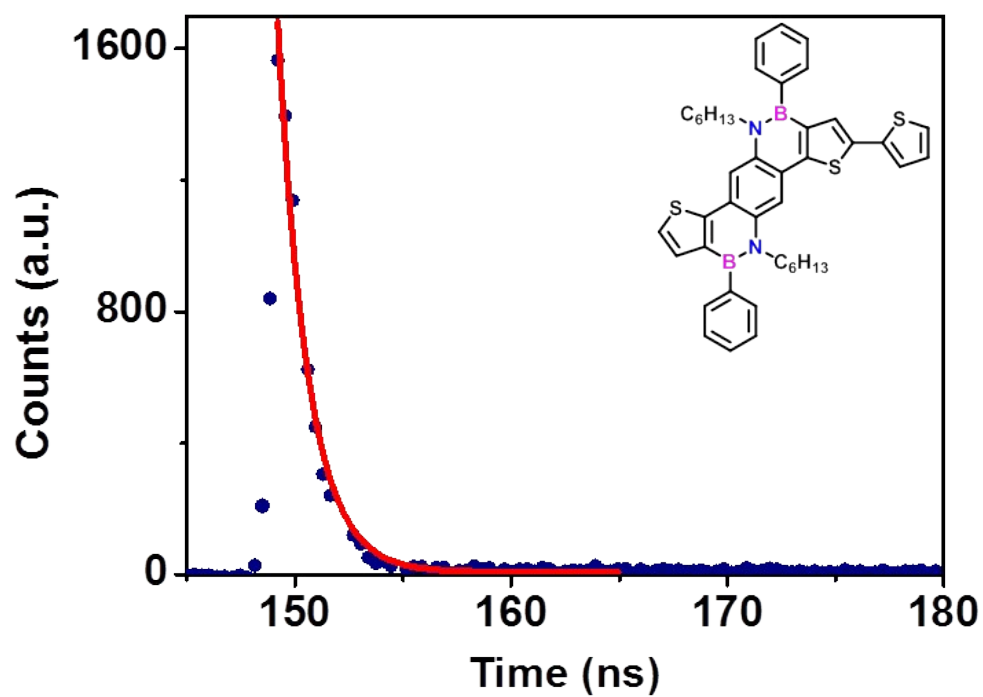

Figure

Figure S20. Fluorescence decay curve for **6a** in  $\text{CHCl}_3$  solution ( $1 \times 10^{-5}$  M).

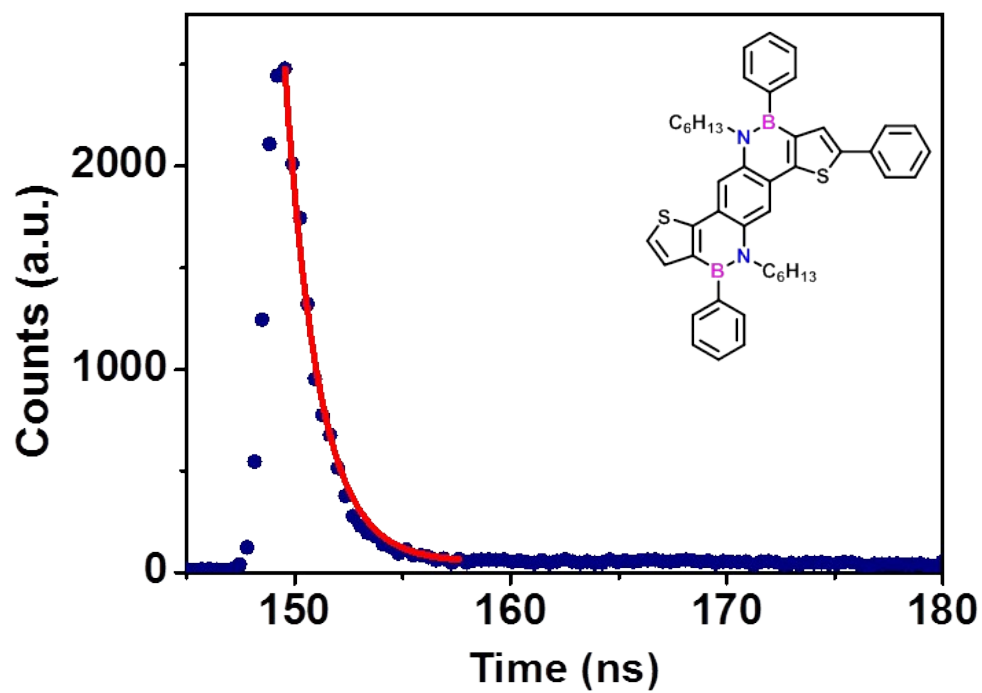

Figure S21. Fluorescence decay curve for **6b** in  $\text{CHCl}_3$  solution ( $1 \times 10^{-5} \text{ M}$ ).

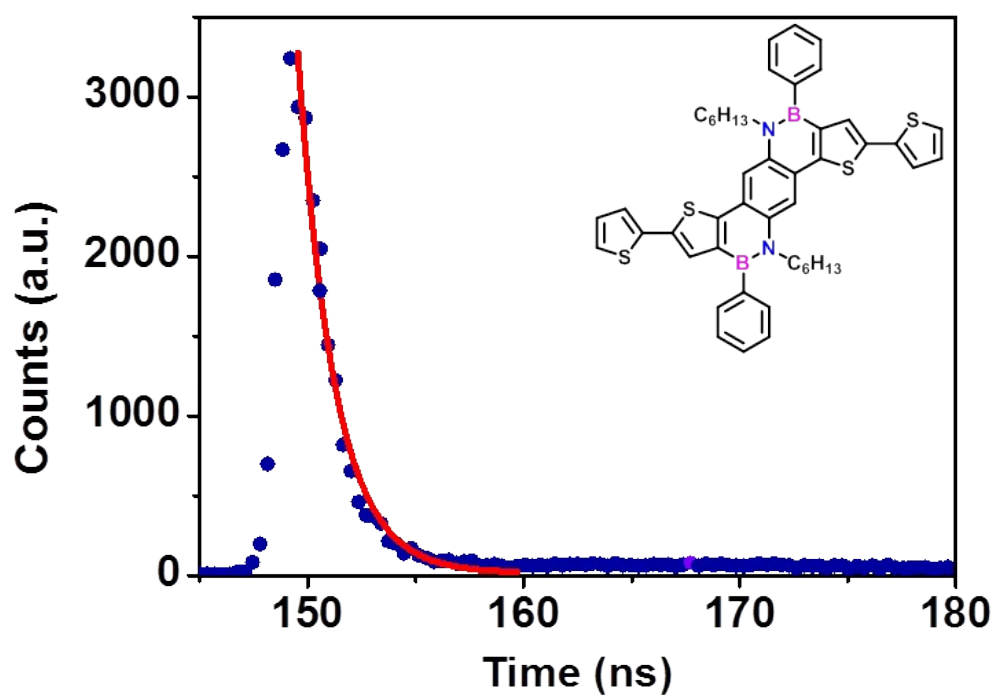

Figure S22. Fluorescence decay curve for **6c** in  $\text{CHCl}_3$  solution ( $1 \times 10^{-5} \text{ M}$ ).

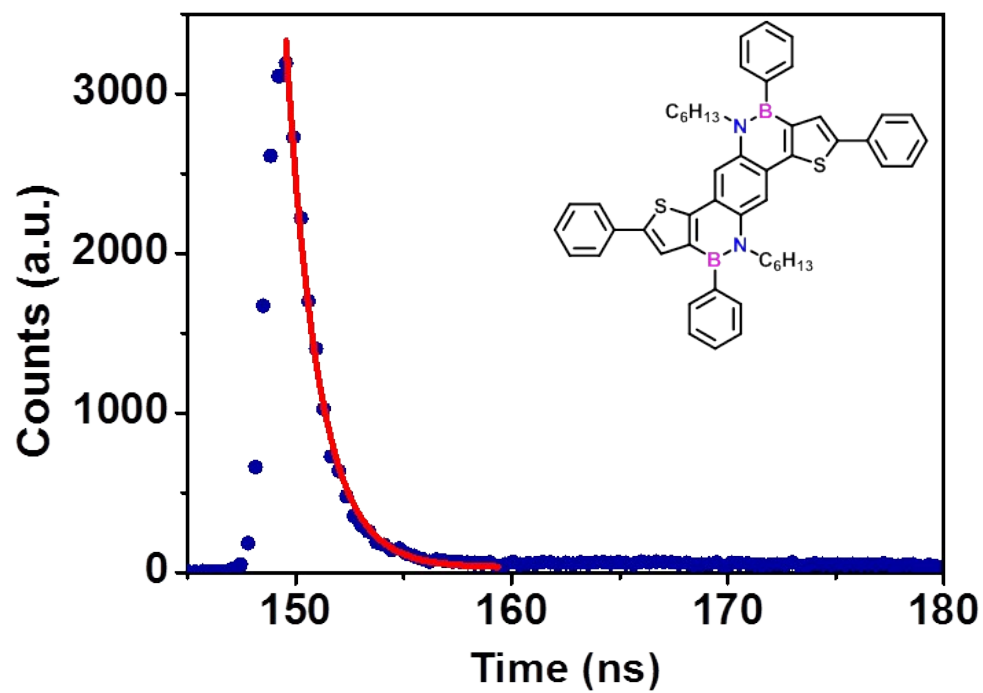

**Figure S23.** Fluorescence decay curve for **6d** in  $\text{CHCl}_3$  solution ( $1 \times 10^{-5} \text{ M}$ ).
